# Supplementary material for: Transcriptomic analysis to uncover genes affecting cold resistance in the Chinese honey bee (Apis cerana cerana)
Source: PLoS One. 2017 Jun 26;12(6):e0179922. doi: 10.1371/journal.pone.0179922 (PMC5484514; doi:10.1371/journal.pone.0179922)
Supplement: S2 Table — (XLS) [file pone.0179922.s002.xls]

## Sheet: ZOTvsZRT.Differential_analysis_
S2 Table. DEGs between ZOT and ZRT, based on corrected P values and log2FoldChange.
Gene_id	FoldChange	log2FoldChange	pval	p-adj	significant	Up/Down
ACSNU00029	0.587476	-0.7674	0.00015944	0.0075628	TRUE	down
ACSNU00038	3.49496	1.8053	1.7442e-05	0.001393	TRUE	up
ACSNU00049	1.54428	0.62693	0.0004093	0.014819	TRUE	up
ACSNU00076	2.68711	1.4261	1.9315e-14	3.4966e-11	TRUE	up
ACSNU00091	0.596721	-0.74487	0.0014614	0.037088	TRUE	down
ACSNU00132	0.608141	-0.71752	0.00031123	0.012339	TRUE	down
ACSNU00158	2.44344	1.2889	0.00027776	0.011471	TRUE	up
ACSNU00172	0.620036	-0.68958	0.0010214	0.028742	TRUE	down
ACSNU00201	3.79767	1.9251	2.1675e-07	4.2807e-05	TRUE	up
ACSNU00213	0.602582	-0.73077	0.00060392	0.019669	TRUE	down
ACSNU00220	1.8988	0.92509	0.0017632	0.042371	TRUE	up
ACSNU00226	2.64982	1.4059	4.1573e-07	7.1677e-05	TRUE	up
ACSNU00228	1.7146	0.77787	0.00010789	0.00601	TRUE	up
ACSNU00230	2.54798	1.3494	8.8591e-07	0.00013365	TRUE	up
ACSNU00324	1.69729	0.76324	0.00078556	0.024104	TRUE	up
ACSNU00393	1.60718	0.68453	0.00025159	0.010717	TRUE	up
ACSNU00412	0.41229	-1.2783	2.7168e-05	0.0020352	TRUE	down
ACSNU00479	0.571479	-0.80723	1.2648e-05	0.0011087	TRUE	down
ACSNU00490	2.19533	1.1344	0.00087168	0.025659	TRUE	up
ACSNU00549	0.39677	-1.3336	7.1805e-06	0.0007358	TRUE	down
ACSNU00590	0.623031	-0.68262	0.00026031	0.010875	TRUE	down
ACSNU00598	0.665807	-0.58682	0.00087097	0.025659	TRUE	down
ACSNU00620	2.00303	1.0022	0.0012983	0.034147	TRUE	up
ACSNU00622	0.613216	-0.70553	0.00015397	0.0074332	TRUE	down
ACSNU00629	1.76987	0.82364	0.00056352	0.019043	TRUE	up
ACSNU00748	0.620597	-0.68827	0.0013064	0.034276	TRUE	down
ACSNU00794	1.6284	0.70345	0.0018449	0.043658	TRUE	up
ACSNU00805	1.54274	0.62549	0.0016512	0.040456	TRUE	up
ACSNU00838	3.54078	1.8241	3.3012e-07	6.0911e-05	TRUE	up
ACSNU00840	2.56996	1.3617	7.3561e-11	4.7001e-08	TRUE	up
ACSNU00842	0.561071	-0.83375	0.00011275	0.0061852	TRUE	down
ACSNU00846	0.604734	-0.72563	8.395e-05	0.0049599	TRUE	down
ACSNU00860	1.7229	0.78484	0.00013146	0.0068077	TRUE	up
ACSNU00870	0.597859	-0.74212	3.4537e-05	0.0024202	TRUE	down
ACSNU00886	0.560611	-0.83493	8.654e-05	0.0050427	TRUE	down
ACSNU00892	2.74969	1.4593	5.0555e-05	0.003308	TRUE	up
ACSNU00903	1.67067	0.74043	0.00038138	0.014029	TRUE	up
ACSNU00912	1.68072	0.74908	0.00062538	0.020038	TRUE	up
ACSNU00924	1.60575	0.68325	0.0021142	0.047289	TRUE	up
ACSNU00972	1.70313	0.76819	0.0018726	0.043837	TRUE	up
ACSNU00986	1.58924	0.66834	0.0002816	0.011542	TRUE	up
ACSNU01000	1.4927	0.57793	0.0022125	0.048647	TRUE	up
ACSNU01087	0.38487	-1.3776	4.5114e-14	7.0005e-11	TRUE	down
ACSNU01095	0.546738	-0.87108	0.00025858	0.010875	TRUE	down
ACSNU01127	0.560916	-0.83414	2.5931e-05	0.0019834	TRUE	down
ACSNU01148	0.365078	-1.4537	0.00013868	0.0069495	TRUE	down
ACSNU01164	0.556422	-0.84575	1.2553e-05	0.0011087	TRUE	down
ACSNU01170	0.631038	-0.6642	0.0009418	0.02728	TRUE	down
ACSNU01172	1.57859	0.65864	0.00018812	0.0086581	TRUE	up
ACSNU01181	0.488107	-1.0347	2.2905e-07	4.4427e-05	TRUE	down
ACSNU01182	0.571938	-0.80607	6.9599e-06	0.00071999	TRUE	down
ACSNU01192	2.09239	1.0652	8.5753e-07	0.00013119	TRUE	up
ACSNU01199	0.513391	-0.96187	3.573e-06	0.00042185	TRUE	down
ACSNU01214	1.51418	0.59854	0.00082357	0.024974	TRUE	up
ACSNU01222	1.62183	0.69763	0.00021082	0.0094626	TRUE	up
ACSNU01224	0.627717	-0.67181	0.0020766	0.046849	TRUE	down
ACSNU01229	0.398228	-1.3283	0.00043255	0.015405	TRUE	down
ACSNU01235	0.564165	-0.82581	4.2044e-06	0.000466	TRUE	down
ACSNU01254	0.595641	-0.74748	0.00099929	0.028414	TRUE	down
ACSNU01260	1.56584	0.64693	0.0005137	0.017714	TRUE	up
ACSNU01261	0.621602	-0.68594	0.002073	0.046849	TRUE	down
ACSNU01263	1.60398	0.68165	0.00058508	0.019375	TRUE	up
ACSNU01323	0.570084	-0.81075	9.2341e-06	0.00087219	TRUE	down
ACSNU01350	0.536666	-0.8979	0.00084184	0.025261	TRUE	down
ACSNU01356	0.546731	-0.8711	0.00017295	0.0080628	TRUE	down
ACSNU01433	0.588354	-0.76524	0.00036887	0.013769	TRUE	down
ACSNU01440	0.524982	-0.92966	1.2614e-06	0.00018029	TRUE	down
ACSNU01452	0.584686	-0.77427	0.00028654	0.011676	TRUE	down
ACSNU01465	1.44803	0.53409	0.0019236	0.044647	TRUE	up
ACSNU01488	0.653401	-0.61396	0.00075535	0.023375	TRUE	down
ACSNU01576	0.557026	-0.84418	3.5977e-05	0.0024891	TRUE	down
ACSNU01644	2.71383	1.4403	3.5775e-05	0.0024891	TRUE	up
ACSNU01645	0.646665	-0.62891	0.00054341	0.018561	TRUE	down
ACSNU01676	3.58029	1.8401	0.00013162	0.0068077	TRUE	up
ACSNU01680	1.60393	0.68161	0.00012552	0.006638	TRUE	up
ACSNU01710	0.558333	-0.8408	0.00087705	0.025747	TRUE	down
ACSNU01748	3.59842	1.8474	4.5417e-07	7.5111e-05	TRUE	up
ACSNU01758	2.96782	1.5694	3.5729e-09	1.386e-06	TRUE	up
ACSNU01783	1.69104	0.75791	0.0016523	0.040456	TRUE	up
ACSNU01784	0.569728	-0.81166	2.5689e-05	0.001979	TRUE	down
ACSNU01787	1.7666	0.82098	4.0356e-06	0.0004578	TRUE	up
ACSNU01790	0.27097	-1.8838	7.2653e-06	0.00073753	TRUE	down
ACSNU01794	1.92795	0.94707	0.0014106	0.036307	TRUE	up
ACSNU01796	2.13112	1.0916	0.00019236	0.0088159	TRUE	up
ACSNU01821	1.83975	0.87951	2.2221e-06	0.00029203	TRUE	up
ACSNU01866	1.52179	0.60577	0.00060915	0.019751	TRUE	up
ACSNU01869	0.623986	-0.68041	0.00018157	0.0084285	TRUE	down
ACSNU01873	0.651827	-0.61744	0.0017566	0.042306	TRUE	down
ACSNU01887	0.515281	-0.95657	0.00033599	0.012942	TRUE	down
ACSNU01888	0.45872	-1.1243	0.0010277	0.028844	TRUE	down
ACSNU01898	0.600043	-0.73686	0.0009821	0.028147	TRUE	down
ACSNU01966	1.69637	0.76245	0.001257	0.033301	TRUE	up
ACSNU01974	0.467977	-1.0955	0.0015966	0.039866	TRUE	down
ACSNU01996	1.6416	0.7151	0.00034205	0.013082	TRUE	up
ACSNU02075	0.580921	-0.78359	3.1959e-05	0.0022838	TRUE	down
ACSNU02090	1.63306	0.70758	0.00014393	0.0071064	TRUE	up
ACSNU02100	2.16357	1.1134	0.00059567	0.019547	TRUE	up
ACSNU02104	1.69564	0.76183	0.00028701	0.011676	TRUE	up
ACSNU02115	0.623444	-0.68167	0.00072775	0.02278	TRUE	down
ACSNU02124	0.5497	-0.86328	9.4609e-05	0.0053803	TRUE	down
ACSNU02132	0.684923	-0.54599	0.0020716	0.046849	TRUE	down
ACSNU02167	1.87553	0.9073	0.00011598	0.0063305	TRUE	up
ACSNU02169	0.623135	-0.68238	0.00023745	0.010235	TRUE	down
ACSNU02203	1.54889	0.63124	0.0011352	0.030794	TRUE	up
ACSNU02227	0.661548	-0.59608	0.00084186	0.025261	TRUE	down
ACSNU02244	1.50959	0.59416	0.00074029	0.023031	TRUE	up
ACSNU02277	0.497917	-1.006	9.7945e-07	0.00014377	TRUE	down
ACSNU02283	0.580057	-0.78573	0.0003291	0.012859	TRUE	down
ACSNU02304	0.1592	-2.6511	4.2923e-07	7.2848e-05	TRUE	down
ACSNU02309	0.551828	-0.85771	2.6112e-05	0.0019834	TRUE	down
ACSNU02314	1.9484	0.96229	4.2704e-06	0.00046854	TRUE	up
ACSNU02322	1.73596	0.79573	6.8424e-05	0.0042961	TRUE	up
ACSNU02324	0.487865	-1.0354	3.1846e-06	0.00038435	TRUE	down
ACSNU02327	2.0678	1.0481	0.00016686	0.0078462	TRUE	up
ACSNU02355	2.31257	1.2095	3.4512e-08	9.1432e-06	TRUE	up
ACSNU02407	0.619547	-0.69071	0.000133	0.0068146	TRUE	down
ACSNU02419	0.40757	-1.2949	8.3669e-10	3.9514e-07	TRUE	down
ACSNU02427	0.572849	-0.80377	0.00017262	0.0080628	TRUE	down
ACSNU02476	0.534075	-0.90489	8.9374e-06	0.0008591	TRUE	down
ACSNU02491	1.69828	0.76408	2.3446e-05	0.0018191	TRUE	up
ACSNU02548	0.555437	-0.84831	0.00027969	0.011508	TRUE	down
ACSNU02581	5.97032	2.5778	5.6551e-13	6.1426e-10	TRUE	up
ACSNU02617	4.06983	2.025	2.6644e-15	7.2351e-12	TRUE	up
ACSNU02622	0.662847	-0.59325	0.00065566	0.020885	TRUE	down
ACSNU02700	0.605767	-0.72317	0.00018693	0.0086399	TRUE	down
ACSNU02711	0.629136	-0.66856	0.00035392	0.013395	TRUE	down
ACSNU02719	1.94178	0.95738	0.0016429	0.040456	TRUE	up
ACSNU02777	0.618808	-0.69244	0.00047493	0.016587	TRUE	down
ACSNU02798	1.68808	0.75538	0.0017699	0.042439	TRUE	up
ACSNU02803	0.525934	-0.92705	0.00040211	0.014657	TRUE	down
ACSNU02842	2.26512	1.1796	0.0017782	0.042544	TRUE	up
ACSNU02855	2.85669	1.5143	0.00012508	0.006638	TRUE	up
ACSNU02868	0.617962	-0.69441	0.00013631	0.0068865	TRUE	down
ACSNU02892	5.67904	2.5056	3.6048e-17	1.9578e-13	TRUE	up
ACSNU02893	1.45227	0.53831	0.0022027	0.04853	TRUE	up
ACSNU02966	1.60123	0.67918	0.0008653	0.025644	TRUE	up
ACSNU02986	1.54906	0.63139	0.0003124	0.012339	TRUE	up
ACSNU02990	2.0321	1.023	0.0015156	0.038075	TRUE	up
ACSNU03027	2.16385	1.1136	0.0018427	0.043658	TRUE	up
ACSNU03090	0.478089	-1.0646	0.00036721	0.013754	TRUE	down
ACSNU03097	2.40568	1.2664	1.4156e-11	1.1828e-08	TRUE	up
ACSNU03124	1.5918	0.67066	0.00022434	0.0098919	TRUE	up
ACSNU03180	3.04492	1.6064	4.4343e-13	5.3517e-10	TRUE	up
ACSNU03200	0.624744	-0.67866	0.001367	0.035354	TRUE	down
ACSNU03212	0.43087	-1.2147	0.00044498	0.015744	TRUE	down
ACSNU03243	1.5175	0.6017	0.0013514	0.0351	TRUE	up
ACSNU03249	0.563455	-0.82763	0.00012095	0.0064754	TRUE	down
ACSNU03257	2.04282	1.0306	8.0024e-08	1.7739e-05	TRUE	up
ACSNU03261	0.55224	-0.85663	1.4689e-05	0.0012368	TRUE	down
ACSNU03274	1.53958	0.62254	0.0011333	0.030794	TRUE	up
ACSNU03283	1.67096	0.74068	6.7316e-05	0.0042759	TRUE	up
ACSNU03314	1.46916	0.55499	0.0019816	0.045699	TRUE	up
ACSNU03360	0.286328	-1.8043	1.2358e-10	7.0648e-08	TRUE	down
ACSNU03370	0.587224	-0.76802	0.00037479	0.013942	TRUE	down
ACSNU03387	0.577322	-0.79255	0.00019477	0.0088518	TRUE	down
ACSNU03422	0.619848	-0.69001	0.00011666	0.0063357	TRUE	down
ACSNU03491	2.16654	1.1154	0.0010019	0.028415	TRUE	up
ACSNU03506	1.64398	0.7172	0.00041138	0.014845	TRUE	up
ACSNU03546	2.67387	1.4189	0.0020008	0.045931	TRUE	up
ACSNU03615	0.550524	-0.86112	0.0010445	0.029123	TRUE	down
ACSNU03660	0.289455	-1.7886	5.8223e-06	0.00060809	TRUE	down
ACSNU03683	3.01087	1.5902	5.02e-09	1.8176e-06	TRUE	up
ACSNU03685	0.576843	-0.79375	0.00014316	0.0071064	TRUE	down
ACSNU03729	2.02243	1.0161	0.0016051	0.039987	TRUE	up
ACSNU03737	0.494453	-1.0161	9.0093e-07	0.00013405	TRUE	down
ACSNU03822	0.575685	-0.79665	0.0014547	0.037004	TRUE	down
ACSNU03837	1.58261	0.66231	0.0016398	0.040456	TRUE	up
ACSNU03860	6.0876	2.6059	7.9282e-11	4.7842e-08	TRUE	up
ACSNU03861	1.95494	0.96713	8.3563e-06	0.00081772	TRUE	up
ACSNU03870	2.81668	1.494	0.00033935	0.013025	TRUE	up
ACSNU03902	0.59082	-0.75921	0.00097711	0.028078	TRUE	down
ACSNU03903	1.52843	0.61205	0.002254	0.049163	TRUE	up
ACSNU03908	0.664334	-0.59002	0.00090688	0.026551	TRUE	down
ACSNU03911	0.557382	-0.84326	0.00046775	0.016442	TRUE	down
ACSNU03958	0.586488	-0.76983	4.5136e-05	0.0030451	TRUE	down
ACSNU04025	0.525359	-0.92863	8.5948e-05	0.0050427	TRUE	down
ACSNU04029	0.600759	-0.73514	0.00012102	0.0064754	TRUE	down
ACSNU04039	1.65242	0.72458	0.00015831	0.0075628	TRUE	up
ACSNU04045	0.510905	-0.96887	0.00015301	0.0074332	TRUE	down
ACSNU04053	3.70992	1.8914	0.0002215	0.0098202	TRUE	up
ACSNU04054	2.57457	1.3643	1.9923e-07	4.0074e-05	TRUE	up
ACSNU04076	0.660833	-0.59764	0.00085819	0.025539	TRUE	down
ACSNU04079	0.609645	-0.71396	0.00080645	0.024606	TRUE	down
ACSNU04112	2.77878	1.4745	4.8433e-08	1.1691e-05	TRUE	up
ACSNU04147	1.55382	0.63582	0.002201	0.04853	TRUE	up
ACSNU04190	2.25368	1.1723	1.29e-08	4.0035e-06	TRUE	up
ACSNU04219	1.62013	0.69611	0.0014185	0.036424	TRUE	up
ACSNU04240	1.99354	0.99533	4.1818e-08	1.0563e-05	TRUE	up
ACSNU04248	3.29403	1.7199	1.0383e-05	0.00097221	TRUE	up
ACSNU04276	0.501164	-0.99664	2.6468e-05	0.0019965	TRUE	down
ACSNU04296	0.506685	-0.98084	7.6079e-07	0.00011976	TRUE	down
ACSNU04311	0.524036	-0.93226	4.5639e-07	7.5111e-05	TRUE	down
ACSNU04455	0.631674	-0.66275	0.0006853	0.021514	TRUE	down
ACSNU04464	1.95579	0.96775	2.7715e-08	7.5261e-06	TRUE	up
ACSNU04467	0.546269	-0.87232	0.00015371	0.0074332	TRUE	down
ACSNU04521	1.5935	0.6722	0.00065967	0.020896	TRUE	up
ACSNU04552	1.89115	0.91927	1.2861e-05	0.0011087	TRUE	up
ACSNU04554	0.635673	-0.65364	0.00031141	0.012339	TRUE	down
ACSNU04555	0.547785	-0.86832	0.00037888	0.013998	TRUE	down
ACSNU04575	0.655772	-0.60873	0.0017533	0.042306	TRUE	down
ACSNU04626	1.99921	0.99943	0.0011566	0.031173	TRUE	up
ACSNU04630	0.583319	-0.77764	3.0069e-05	0.0022218	TRUE	down
ACSNU04657	0.61222	-0.70788	0.00056803	0.019043	TRUE	down
ACSNU04677	1.94508	0.95983	0.001809	0.04309	TRUE	up
ACSNU04686	1.95634	0.96816	6.6494e-07	0.00010621	TRUE	up
ACSNU04688	1.73505	0.79498	0.00014377	0.0071064	TRUE	up
ACSNU04704	1.89692	0.92366	3.164e-06	0.00038435	TRUE	up
ACSNU04715	0.347706	-1.5241	4.707e-05	0.0031259	TRUE	down
ACSNU04723	0.575961	-0.79596	0.00012982	0.0067795	TRUE	down
ACSNU04767	0.509855	-0.97184	9.765e-08	2.1213e-05	TRUE	down
ACSNU04773	0.416891	-1.2623	0.0003607	0.013557	TRUE	down
ACSNU04831	1.73446	0.79448	7.4896e-05	0.0045884	TRUE	up
ACSNU04886	1.475	0.56072	0.0018654	0.043837	TRUE	up
ACSNU04901	1.89827	0.92468	0.00011273	0.0061852	TRUE	up
ACSNU04910	1.85378	0.89047	0.0016537	0.040456	TRUE	up
ACSNU04940	0.588481	-0.76493	0.0011725	0.031369	TRUE	down
ACSNU04980	1.74315	0.8017	0.00085296	0.025453	TRUE	up
ACSNU04995	1.64758	0.72035	0.0019762	0.045671	TRUE	up
ACSNU05008	2.48755	1.3147	6.9279e-08	1.5677e-05	TRUE	up
ACSNU05039	1.55287	0.63494	0.00093816	0.027262	TRUE	up
ACSNU05040	1.60072	0.67872	0.00032763	0.012847	TRUE	up
ACSNU05047	0.570472	-0.80977	8.4019e-05	0.0049599	TRUE	down
ACSNU05056	5.00869	2.3244	0.0011315	0.030794	TRUE	up
ACSNU05066	1.85984	0.89518	1.7941e-06	0.00024985	TRUE	up
ACSNU05075	2.20616	1.1415	1.0752e-09	4.866e-07	TRUE	up
ACSNU05087	1.79135	0.84105	1.1455e-05	0.0010456	TRUE	up
ACSNU05115	1.6334	0.70788	8.6816e-05	0.0050427	TRUE	up
ACSNU05181	0.642103	-0.63912	0.0009756	0.028078	TRUE	down
ACSNU05188	0.236008	-2.0831	8.7519e-05	0.0050566	TRUE	down
ACSNU05193	0.686828	-0.54198	0.0020427	0.04671	TRUE	down
ACSNU05203	0.583261	-0.77779	1.2828e-05	0.0011087	TRUE	down
ACSNU05223	0.526538	-0.92539	8.8556e-05	0.0050894	TRUE	down
ACSNU05240	0.505811	-0.98333	1.4193e-06	0.00020022	TRUE	down
ACSNU05245	0.380643	-1.3935	1.6867e-07	3.4567e-05	TRUE	down
ACSNU05291	1.55111	0.63331	0.00060482	0.019669	TRUE	up
ACSNU05328	1.49674	0.58182	0.0011645	0.031275	TRUE	up
ACSNU05334	0.569435	-0.8124	3.7081e-05	0.0025492	TRUE	down
ACSNU05355	0.611559	-0.70944	0.00013239	0.0068146	TRUE	down
ACSNU05406	0.474046	-1.0769	3.2669e-09	1.3143e-06	TRUE	down
ACSNU05446	0.652189	-0.61664	0.001467	0.037143	TRUE	down
ACSNU05448	0.582808	-0.77891	0.00033265	0.012942	TRUE	down
ACSNU05449	0.540316	-0.88812	0.00056483	0.019043	TRUE	down
ACSNU05465	4.11852	2.0421	1.489e-14	3.2347e-11	TRUE	up
ACSNU05515	1.85764	0.89347	0.00027236	0.011291	TRUE	up
ACSNU05534	0.628709	-0.66953	0.00019741	0.0089344	TRUE	down
ACSNU05570	1.77728	0.82967	1.2751e-05	0.0011087	TRUE	up
ACSNU05571	1.49101	0.57629	0.0011661	0.031275	TRUE	up
ACSNU05618	1.79978	0.84782	0.00025716	0.010869	TRUE	up
ACSNU05698	2.54378	1.347	1.1362e-07	2.4199e-05	TRUE	up
ACSNU05727	0.599261	-0.73874	0.00012589	0.006638	TRUE	down
ACSNU05770	0.587044	-0.76846	0.0022485	0.049163	TRUE	down
ACSNU05779	1.56228	0.64365	0.00021539	0.0095884	TRUE	up
ACSNU05789	0.37314	-1.4222	6.6271e-05	0.0042343	TRUE	down
ACSNU05795	0.652003	-0.61705	0.0010594	0.029429	TRUE	down
ACSNU05865	0.650882	-0.61953	0.00038232	0.014029	TRUE	down
ACSNU05893	2.19734	1.1358	1.8252e-06	0.00025096	TRUE	up
ACSNU05908	0.502392	-0.99312	1.8414e-08	5.2635e-06	TRUE	down
ACSNU05918	2.01085	1.0078	4.0083e-07	7.0222e-05	TRUE	up
ACSNU05921	1.71302	0.77654	0.0020626	0.046849	TRUE	up
ACSNU05961	2.9613	1.5662	2.3402e-06	0.00029904	TRUE	up
ACSNU05966	1.88457	0.91424	0.00059556	0.019547	TRUE	up
ACSNU05968	0.649982	-0.62153	0.0010457	0.029123	TRUE	down
ACSNU05983	0.649844	-0.62183	0.0022877	0.049599	TRUE	down
ACSNU05984	0.606906	-0.72046	0.00036058	0.013557	TRUE	down
ACSNU06002	0.576231	-0.79528	1.4861e-05	0.0012417	TRUE	down
ACSNU06066	2.37758	1.2495	3.5902e-12	3.5452e-09	TRUE	up
ACSNU06108	0.587656	-0.76696	6.2077e-05	0.0040136	TRUE	down
ACSNU06109	0.582554	-0.77954	1.2341e-05	0.0011078	TRUE	down
ACSNU06117	0.636737	-0.65123	0.001842	0.043658	TRUE	down
ACSNU06164	4.90251	2.2935	7.029e-09	2.3136e-06	TRUE	up
ACSNU06200	2.94461	1.5581	1.2334e-15	4.4657e-12	TRUE	up
ACSNU06219	0.649168	-0.62334	0.0011102	0.030376	TRUE	down
ACSNU06223	1.7706	0.82424	0.00065987	0.020896	TRUE	up
ACSNU06343	0.516891	-0.95207	0.00067151	0.021203	TRUE	down
ACSNU06511	0.603827	-0.72779	0.00033465	0.012942	TRUE	down
ACSNU06512	0.584275	-0.77528	3.2897e-05	0.0023203	TRUE	down
ACSNU06522	1.55207	0.6342	0.0020919	0.047044	TRUE	up
ACSNU06523	0.274338	-1.866	6.2334e-09	2.1159e-06	TRUE	down
ACSNU06558	0.600905	-0.73479	9.3716e-05	0.0053576	TRUE	down
ACSNU06561	0.431398	-1.2129	4.1306e-06	0.00046254	TRUE	down
ACSNU06590	1.71116	0.77497	0.00015279	0.0074332	TRUE	up
ACSNU06592	0.68621	-0.54328	0.0020043	0.045931	TRUE	down
ACSNU06643	0.303733	-1.7191	3.7811e-05	0.002583	TRUE	down
ACSNU06701	1.90818	0.9322	0.00077897	0.023969	TRUE	up
ACSNU06714	3.36125	1.749	1.3629e-05	0.0011657	TRUE	up
ACSNU06737	1.88145	0.91185	7.6083e-06	0.0007652	TRUE	up
ACSNU06765	4.21258	2.0747	9.0787e-06	0.00086503	TRUE	up
ACSNU06804	0.492046	-1.0231	6.8028e-05	0.004296	TRUE	down
ACSNU06805	0.572783	-0.80394	0.0011458	0.030958	TRUE	down
ACSNU06812	1.7514	0.80851	3.1033e-05	0.0022472	TRUE	up
ACSNU06824	1.57047	0.65119	0.00026704	0.011113	TRUE	up
ACSNU06860	0.548281	-0.86701	0.0020789	0.046849	TRUE	down
ACSNU06869	0.540615	-0.88733	1.5564e-05	0.0012807	TRUE	down
ACSNU06877	0.450273	-1.1511	1.3669e-08	4.1243e-06	TRUE	down
ACSNU06959	1.68485	0.75262	0.00029008	0.011757	TRUE	up
ACSNU06972	1.55027	0.63252	0.00062399	0.020038	TRUE	up
ACSNU06985	0.673806	-0.5696	0.0010933	0.030064	TRUE	down
ACSNU06987	0.633912	-0.65765	0.0018027	0.043035	TRUE	down
ACSNU06992	0.648563	-0.62468	0.00093868	0.027262	TRUE	down
ACSNU06993	0.654419	-0.61171	0.00099066	0.028243	TRUE	down
ACSNU07011	0.605977	-0.72266	4.6933e-05	0.0031259	TRUE	down
ACSNU07017	0.545558	-0.8742	0.0005175	0.017732	TRUE	down
ACSNU07043	0.250171	-1.999	5.3598e-11	3.8812e-08	TRUE	down
ACSNU07062	0.682319	-0.55148	0.0016691	0.04065	TRUE	down
ACSNU07064	0.642822	-0.63751	0.00043852	0.015566	TRUE	down
ACSNU07073	0.473396	-1.0789	1.0089e-08	3.2231e-06	TRUE	down
ACSNU07102	1.68273	0.75081	6.5434e-05	0.0042056	TRUE	up
ACSNU07107	0.416997	-1.2619	1.393e-10	7.5654e-08	TRUE	down
ACSNU07119	0.521244	-0.93997	1.1183e-05	0.0010342	TRUE	down
ACSNU07120	1.43978	0.52585	0.0021238	0.047369	TRUE	up
ACSNU07145	2.49851	1.3211	6.4592e-11	4.385e-08	TRUE	up
ACSNU07146	2.489	1.3156	7.738e-06	0.00077111	TRUE	up
ACSNU07148	1.53383	0.61714	0.00065339	0.020874	TRUE	up
ACSNU07175	0.565143	-0.82331	0.00042913	0.015333	TRUE	down
ACSNU07190	1.58351	0.66313	0.00045621	0.016089	TRUE	up
ACSNU07198	2.33286	1.2221	1.3522e-07	2.8246e-05	TRUE	up
ACSNU07214	1.76782	0.82198	0.00086644	0.025644	TRUE	up
ACSNU07224	2.2576	1.1748	0.0009463	0.027337	TRUE	up
ACSNU07244	1.6158	0.69225	0.00013884	0.0069495	TRUE	up
ACSNU07255	0.631855	-0.66233	0.0016123	0.040076	TRUE	down
ACSNU07261	1.56473	0.64591	0.00023722	0.010235	TRUE	up
ACSNU07324	0.522573	-0.93629	8.9347e-06	0.0008591	TRUE	down
ACSNU07439	0.515446	-0.95611	3.2381e-07	6.0911e-05	TRUE	down
ACSNU07442	0.615844	-0.69936	0.00021284	0.0095139	TRUE	down
ACSNU07445	3.45847	1.7901	0.0015692	0.039274	TRUE	up
ACSNU07466	1.69019	0.75718	0.00056688	0.019043	TRUE	up
ACSNU07478	0.629863	-0.66689	0.0018704	0.043837	TRUE	down
ACSNU07507	0.444191	-1.1707	6.6273e-08	1.5316e-05	TRUE	down
ACSNU07515	1.50151	0.58642	0.0021159	0.047289	TRUE	up
ACSNU07516	2.2587	1.1755	1.521e-05	0.0012611	TRUE	up
ACSNU07546	1.62757	0.70272	0.00011073	0.0061367	TRUE	up
ACSNU07560	2.6362	1.3985	0.0016654	0.04065	TRUE	up
ACSNU07562	1.89314	0.92078	2.036e-06	0.00027302	TRUE	up
ACSNU07591	0.576891	-0.79363	0.00049284	0.017049	TRUE	down
ACSNU07610	1.5788	0.65883	0.00025958	0.010875	TRUE	up
ACSNU07643	1.76258	0.81769	3.0789e-05	0.0022445	TRUE	up
ACSNU07652	2.54177	1.3458	5.0178e-05	0.0033032	TRUE	up
ACSNU07693	1.90868	0.93258	3.5358e-06	0.00042185	TRUE	up
ACSNU07704	1.64408	0.71728	7.7411e-05	0.0046455	TRUE	up
ACSNU07725	1.67792	0.74667	0.0011051	0.030312	TRUE	up
ACSNU07738	0.549362	-0.86417	0.00030855	0.012322	TRUE	down
ACSNU07746	0.621712	-0.68568	0.00031922	0.012563	TRUE	down
ACSNU07765	0.677386	-0.56195	0.0021782	0.048284	TRUE	down
ACSNU07786	1.51871	0.60285	0.0016225	0.040237	TRUE	up
ACSNU07796	0.584916	-0.7737	9.8647e-05	0.0055518	TRUE	down
ACSNU07807	0.602056	-0.73203	0.0021628	0.048041	TRUE	down
ACSNU07883	0.419535	-1.2531	0.00023535	0.010235	TRUE	down
ACSNU07895	10.2463	3.357	4.8646e-12	4.4033e-09	TRUE	up
ACSNU07912	0.635452	-0.65414	0.00024616	0.010527	TRUE	down
ACSNU07923	1.62304	0.6987	0.0003075	0.012322	TRUE	up
ACSNU07940	1.68311	0.75113	0.00015922	0.0075628	TRUE	up
ACSNU07952	0.570196	-0.81047	8.0017e-06	0.00079014	TRUE	down
ACSNU07955	0.60986	-0.71345	0.0010877	0.029986	TRUE	down
ACSNU07977	0.561316	-0.83311	0.0014344	0.036661	TRUE	down
ACSNU07990	1.52934	0.61291	0.0011368	0.030794	TRUE	up
ACSNU08021	2.17746	1.1226	0.0021155	0.047289	TRUE	up
ACSNU08060	0.582432	-0.77984	1.7614e-05	0.0013965	TRUE	down
ACSNU08087	0.483647	-1.048	4.8715e-06	0.00051876	TRUE	down
ACSNU08109	0.48282	-1.0504	1.7173e-05	0.0013817	TRUE	down
ACSNU08128	2.2301	1.1571	0.0010796	0.029837	TRUE	up
ACSNU08133	1.72322	0.7851	0.0011785	0.031451	TRUE	up
ACSNU08200	2.97427	1.5725	0.00046954	0.016452	TRUE	up
ACSNU08229	4.62472	2.2094	4.1431e-20	4.5002e-16	TRUE	up
ACSNU08260	2.49177	1.3172	0.00022494	0.0098919	TRUE	up
ACSNU08334	0.639166	-0.64574	0.001342	0.034956	TRUE	down
ACSNU08383	4.33544	2.1162	1.535e-08	4.5063e-06	TRUE	up
ACSNU08398	2.78865	1.4796	0.00091112	0.026604	TRUE	up
ACSNU08399	1.62265	0.69835	0.0001191	0.0064364	TRUE	up
ACSNU08448	0.584231	-0.77539	0.00080572	0.024606	TRUE	down
ACSNU08466	6.61587	2.7259	4.7858e-07	7.7587e-05	TRUE	up
ACSNU08493	0.258937	-1.9493	0.00016088	0.0075977	TRUE	down
ACSNU08563	1.94141	0.9571	0.0014705	0.037145	TRUE	up
ACSNU08580	1.56529	0.64643	0.0013358	0.034903	TRUE	up
ACSNU08596	2.58764	1.3716	2.0926e-05	0.0016352	TRUE	up
ACSNU08607	0.333935	-1.5824	1.2027e-05	0.0010887	TRUE	down
ACSNU08626	1.99252	0.99459	4.301e-08	1.0618e-05	TRUE	up
ACSNU08627	1.75406	0.8107	0.0010656	0.029527	TRUE	up
ACSNU08650	3.19418	1.6754	0.0012354	0.03281	TRUE	up
ACSNU08665	1.53494	0.61819	0.00061462	0.01981	TRUE	up
ACSNU08749	3.15	1.6554	5.771e-06	0.00060809	TRUE	up
ACSNU08751	0.590122	-0.76092	7.7003e-05	0.0046455	TRUE	down
ACSNU08768	0.684955	-0.54592	0.0022309	0.048954	TRUE	down
ACSNU08777	1.57826	0.65833	0.00040928	0.014819	TRUE	up
ACSNU08903	1.69466	0.761	0.0019356	0.044829	TRUE	up
ACSNU08911	1.82331	0.86656	0.0019013	0.044223	TRUE	up
ACSNU08913	4.23984	2.084	4.3949e-09	1.6461e-06	TRUE	up
ACSNU08914	3.52201	1.8164	0.00010772	0.00601	TRUE	up
ACSNU08916	0.540561	-0.88747	0.00047671	0.016596	TRUE	down
ACSNU08929	0.192917	-2.3739	0.0021378	0.047583	TRUE	down
ACSNU08934	1.57105	0.65173	0.00029881	0.012066	TRUE	up
ACSNU08959	1.79535	0.84426	3.7145e-06	0.00043384	TRUE	up
ACSNU09008	1.68592	0.75354	7.6609e-05	0.0046455	TRUE	up
ACSNU09014	1.69631	0.7624	1.8518e-05	0.0014575	TRUE	up
ACSNU09016	1.55556	0.63744	0.0014042	0.03623	TRUE	up
ACSNU09023	1.8936	0.92113	1.6651e-05	0.0013599	TRUE	up
ACSNU09026	1.8741	0.9062	0.00098724	0.028219	TRUE	up
ACSNU09038	0.619142	-0.69166	0.00033511	0.012942	TRUE	down
ACSNU09042	0.569798	-0.81148	1.6855e-05	0.0013663	TRUE	down
ACSNU09067	0.561425	-0.83283	0.00025693	0.010869	TRUE	down
ACSNU09076	0.492073	-1.0231	3.0773e-05	0.0022445	TRUE	down
ACSNU09106	0.573344	-0.80253	4.1995e-05	0.0028509	TRUE	down
ACSNU09111	0.520304	-0.94257	3.7436e-07	6.666e-05	TRUE	down
ACSNU09137	0.58787	-0.76643	0.00015832	0.0075628	TRUE	down
ACSNU09144	0.618492	-0.69317	0.0008512	0.025453	TRUE	down
ACSNU09188	0.505184	-0.98512	0.0018971	0.044221	TRUE	down
ACSNU09215	1.49726	0.58233	0.0020516	0.046815	TRUE	up
ACSNU09250	2.6066	1.3822	2.2315e-06	0.00029203	TRUE	up
ACSNU09345	0.459377	-1.1223	5.5961e-09	1.9608e-06	TRUE	down
ACSNU09380	1.91909	0.94042	0.0017102	0.041464	TRUE	up
ACSNU09396	2.77156	1.4707	3.3086e-07	6.0911e-05	TRUE	up
ACSNU09410	3.91152	1.9677	2.4108e-06	0.00030449	TRUE	up
ACSNU09411	3.44391	1.784	1.0329e-06	0.00014959	TRUE	up
ACSNU09454	0.312342	-1.6788	2.3069e-06	0.00029831	TRUE	down
ACSNU09467	0.463686	-1.1088	0.0014344	0.036661	TRUE	down
ACSNU09475	1.49789	0.58293	0.0014484	0.036932	TRUE	up
ACSNU09485	0.538293	-0.89354	3.8499e-06	0.00044486	TRUE	down
ACSNU09489	0.615393	-0.70042	0.00048026	0.016666	TRUE	down
ACSNU09520	2.12151	1.0851	0.00023681	0.010235	TRUE	up
ACSNU09530	1.45558	0.5416	0.0021873	0.048389	TRUE	up
ACSNU09646	1.49516	0.5803	0.0022876	0.049599	TRUE	up
ACSNU09663	0.437829	-1.1916	0.00042617	0.015328	TRUE	down
ACSNU09670	0.650236	-0.62097	0.00057774	0.01925	TRUE	down
ACSNU09749	0.589334	-0.76284	3.2705e-05	0.0023203	TRUE	down
ACSNU09764	1.57354	0.65402	0.0002354	0.010235	TRUE	up
ACSNU09779	1.7036	0.76858	0.0010183	0.028729	TRUE	up
ACSNU09820	0.412974	-1.2759	4.8312e-06	0.00051876	TRUE	down
ACSNU09823	1.56181	0.64322	0.00077233	0.023833	TRUE	up
ACSNU09844	2.28264	1.1907	3.1829e-05	0.0022838	TRUE	up
ACSNU09858	0.419995	-1.2516	2.4944e-08	6.9474e-06	TRUE	down
ACSNU09861	1.81074	0.85658	0.00039526	0.014456	TRUE	up
ACSNU09892	0.566356	-0.82022	0.00083091	0.02507	TRUE	down
ACSNU09897	0.656594	-0.60693	0.0010168	0.028729	TRUE	down
ACSNU09936	2.48899	1.3156	0.0020656	0.046849	TRUE	up
ACSNU09967	0.499938	-1.0002	0.00055262	0.018817	TRUE	down
ACSNU09971	0.535283	-0.90163	0.001497	0.037726	TRUE	down
ACSNU09981	0.586249	-0.77042	0.00037701	0.013976	TRUE	down
ACSNU09990	0.664485	-0.58969	0.0019958	0.045928	TRUE	down
ACSNU10054	2.43558	1.2843	0.001872	0.043837	TRUE	up
ACSNU10100	0.589385	-0.76272	0.00019403	0.0088518	TRUE	down
ACSNU10118	1.81594	0.86072	0.00068495	0.021514	TRUE	up
ACSNU10145	0.643947	-0.63499	0.00061222	0.019792	TRUE	down
ACSNU10241	1.47332	0.55907	0.0017095	0.041464	TRUE	up
ACSNU10246	3.0892	1.6272	0.0022792	0.049599	TRUE	up
ACSNU10255	0.662293	-0.59446	0.0013367	0.034903	TRUE	down
ACSNU10259	3.22188	1.6879	7.0811e-10	3.4961e-07	TRUE	up
ACSNU10299	1.6006	0.67861	0.00042854	0.015333	TRUE	up
ACSNU10330	2.34854	1.2318	2.996e-10	1.5497e-07	TRUE	up
ACSNU10392	0.415497	-1.2671	0.00051744	0.017732	TRUE	down
ACSNU10432	1.61723	0.69352	0.00073587	0.022969	TRUE	up
ACSNU10443	2.77214	1.471	4.0461e-06	0.0004578	TRUE	up
ACSNU10467	0.138488	-2.8522	2.9731e-09	1.2421e-06	TRUE	down
ACSNU10470	2.01836	1.0132	2.9146e-05	0.0021684	TRUE	up
ACSNU10506	1.50505	0.58981	0.0022498	0.049163	TRUE	up
ACSNU10512	0.404922	-1.3043	4.7211e-11	3.6629e-08	TRUE	down
ACSNU10520	1.64471	0.71783	0.00034676	0.01317	TRUE	up
ACSNU10622	2.51392	1.3299	0.0015178	0.038075	TRUE	up
Novel00018	2.11776	1.0825	0.00013529	0.0068724	TRUE	up
Novel00022	4.3459	2.1197	0.00030381	0.012222	TRUE	up
Novel00051	0.329922	-1.5998	0.00082543	0.024974	TRUE	down
Novel00089	0.441241	-1.1804	2.767e-06	0.00034546	TRUE	down
Novel00103	1.73509	0.79501	0.00059052	0.019496	TRUE	up
Novel00110	1.74912	0.80663	7.5193e-05	0.0045884	TRUE	up
Novel00128	6.3244	2.6609	3.1871e-13	4.3273e-10	TRUE	up
Novel00153	4.37786	2.1302	5.1563e-08	1.2176e-05	TRUE	up
Novel00158	2.37828	1.2499	5.4486e-05	0.0035439	TRUE	up
Novel00175	2.10213	1.0719	4.7196e-05	0.0031259	TRUE	up
Novel00187	5.22196	2.3846	0.00020226	0.0091161	TRUE	up
Novel00205	2.05283	1.0376	0.0001354	0.0068724	TRUE	up
Novel00235	1.65699	0.72856	0.00034422	0.013119	TRUE	up
Novel00247	1.60317	0.68093	0.0012729	0.033642	TRUE	up
Novel00277	1.56822	0.64913	0.00056313	0.019043	TRUE	up
Novel00278	2.43443	1.2836	1.8533e-06	0.00025163	TRUE	up
Novel00279	2.2332	1.1591	1.1235e-05	0.0010342	TRUE	up
Novel00294	2.01475	1.0106	0.0012864	0.033914	TRUE	up
Novel00320	4.96172	2.3108	0.0010451	0.029123	TRUE	up
Novel00385	10.1853	3.3484	0.00012841	0.006738	TRUE	up
Novel00420	1.97162	0.97938	7.3478e-05	0.0045348	TRUE	up
Novel00444	4.02345	2.0084	3.476e-07	6.2927e-05	TRUE	up
Novel00449	1.72662	0.78795	0.00023886	0.010255	TRUE	up
Novel00455	1.74966	0.80707	0.00074211	0.023031	TRUE	up
Novel00459	0.309676	-1.6912	7.9456e-05	0.004742	TRUE	down
Novel00487	0.532304	-0.90968	0.00058183	0.019327	TRUE	down
Novel00531	3.6189	1.8556	3.5636e-08	9.2162e-06	TRUE	up
Novel00537	1.79293	0.84232	7.2152e-05	0.0044784	TRUE	up
Novel00588	0.497729	-1.0066	7.1814e-05	0.0044784	TRUE	down
Novel00590	8.2925	3.0518	2.3242e-09	1.0098e-06	TRUE	up
Novel00607	3.67374	1.8773	8.1941e-07	0.00012715	TRUE	up
Novel00613	2.22327	1.1527	0.00057723	0.01925	TRUE	up
Novel00624	0.556301	-0.84606	1.3918e-05	0.0011811	TRUE	down
Novel00630	1.59795	0.67622	0.00060006	0.019632	TRUE	up
Novel00632	8.77622	3.1336	9.5672e-05	0.0054124	TRUE	up
Novel00699	0.0908299	-3.4607	0.0017178	0.041557	TRUE	down
Novel00732	2.40808	1.2679	0.00014461	0.0071077	TRUE	up
Novel00741	2.4218	1.2761	0.001193	0.031761	TRUE	up
Novel00776	0.434402	-1.2029	0.0016285	0.040294	TRUE	down
Novel00803	4.61939	2.2077	4.7174e-06	0.00051241	TRUE	up
Novel00834	0.505816	-0.98332	2.8681e-06	0.00035401	TRUE	down
Novel00844	2.37111	1.2456	0.00081994	0.024947	TRUE	up
Novel00886	1.46354	0.54946	0.0018857	0.044048	TRUE	up
Novel00894	0.662863	-0.59322	0.0018531	0.043757	TRUE	down
Novel00913	2.02543	1.0182	0.001354	0.0351	TRUE	up
